# Supplementary material for: Appropriateness of reference genes for normalizing messenger RNA in mouse 2,4-dinitrobenzene sulfonic acid (DNBS)-induced colitis using quantitative real time PCR
Source: PubMed Central journal article supplement (PMC5301225; doi:10.1038/srep42427), 2017-02-10

**Appropriateness of reference genes for normalizing messenger RNA in mouse 2,4-dinitrobenzene sulfonic acid (DNBS)-induced colitis using quantitative real time PCR**

Nour Eissa<sup>1,2\*</sup>, Laëtitia Kermarrec<sup>1\*</sup>, Hayam Hussein<sup>3</sup>, Charles N. Bernstein<sup>4,5</sup>, Jean-Eric Ghia<sup>1,2,4,5</sup>

<sup>1</sup>Immunology, University of Manitoba, Winnipeg, MB, Canada

<sup>2</sup>Children's Hospital Research Institute of Manitoba, University of Manitoba, Winnipeg, MB, Canada

<sup>3</sup>Large Animal Medicine, William R. Pritchard Veterinary Medical Teaching Hospital, School of Veterinary Medicine, University of California Davis, CA, USA

<sup>4</sup>Internal Medicine section of Gastroenterology, University of Manitoba, Winnipeg, MB, Canada

<sup>5</sup>IBD Clinical and Research Centre, University of Manitoba, Winnipeg, MB, Canada

\* First co-authorship, authors contributed equally

**Corresponding address:**

**Dr. Jean-Eric Ghia**, Department of Immunology, College of Medicine, University of Manitoba, 431 Apotex Centre, 750 McDermot Avenue, Winnipeg, MB R3E 0T5 Canada  
Tel: +1 (204) 789-3802, Fax: +1 (204) 789-3921 Email: [Jean-Eric.Ghia@umanitoba.ca](mailto:Jean-Eric.Ghia@umanitoba.ca)  
or [jeghia@yahoo.fr](mailto:jeghia@yahoo.fr)

## **Supplementary figures legend**

**Figure S1. Amplification efficiency of primers reference gene candidates.** The X-axis denotes the log<sub>10</sub> cDNA dilution series, and the Y-axis denotes the cycle threshold (Ct). The primer efficiency (E) is computed by  $[10(1/S)-1] \times 100\%$ , where S represents the slope of the linear regression line. ROCH Light Cycler Software was used for analysis.

|                |         |
|----------------|---------|
| Gene Name      | Actb    |
| Slope          | -3.5600 |
| Efficiency     | 1.91    |
| Error          | 0.15    |
| R <sup>2</sup> | 1.00    |
| Y-Intercept    | 45.51   |

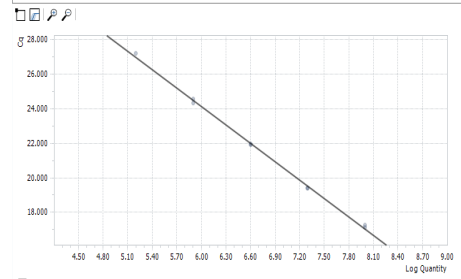

|                |         |
|----------------|---------|
| Gene Name      | Eef2    |
| Slope          | -3.3235 |
| Efficiency     | 2.00    |
| Error          | 0.21    |
| R <sup>2</sup> | 1.00    |
| Y-Intercept    | 44.92   |

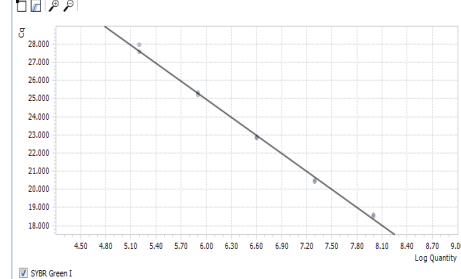

|                |         |
|----------------|---------|
| Gene Name      | Eef2    |
| Slope          | -3.3578 |
| Efficiency     | 1.99    |
| Error          | 0.24    |
| R <sup>2</sup> | 1.00    |
| Y-Intercept    | 45.05   |

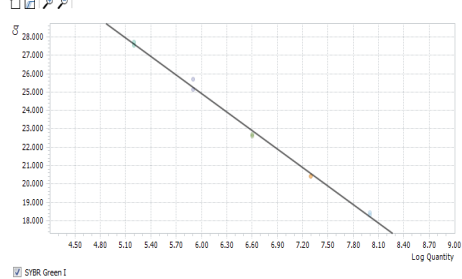

|                |         |
|----------------|---------|
| Gene Name      | Gapdh   |
| Slope          | -3.2991 |
| Efficiency     | 2.02    |
| Error          | 0.19    |
| R <sup>2</sup> | 1.00    |
| Y-Intercept    | 44.51   |

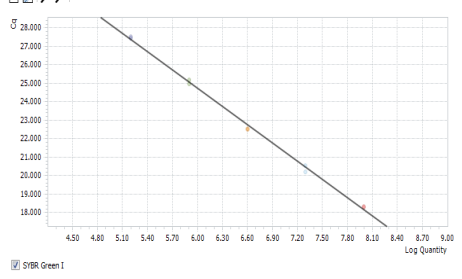

|                |         |
|----------------|---------|
| Gene Name      | Gusb    |
| Slope          | -3.5383 |
| Efficiency     | 1.92    |
| Error          | 0.30    |
| R <sup>2</sup> | 0.99    |
| Y-Intercept    | 56.21   |

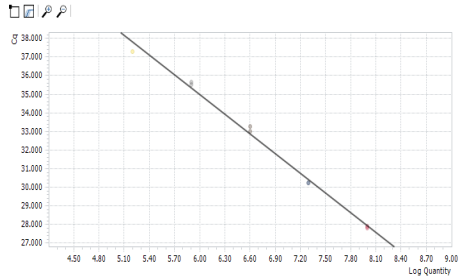

|                |         |
|----------------|---------|
| Gene Name      | Hmbs    |
| Slope          | -3.1232 |
| Efficiency     | 2.09    |
| Error          | 0.37    |
| R <sup>2</sup> | 0.99    |
| Y-Intercept    | 49.76   |

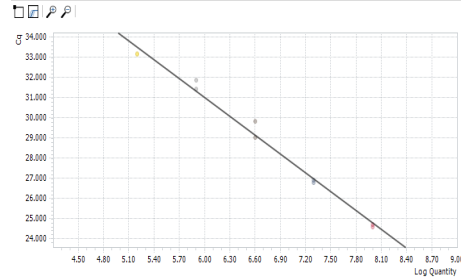

|                |         |
|----------------|---------|
| Gene Name      | Hprt    |
| Slope          | -3.4765 |
| Efficiency     | 1.94    |
| Error          | 0.20    |
| R <sup>2</sup> | 1.00    |
| Y-Intercept    | 49.24   |

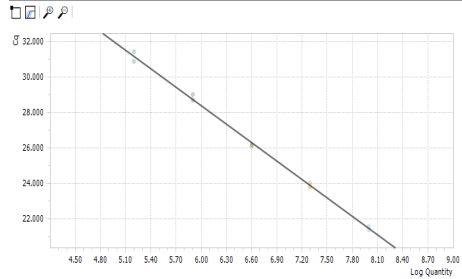

|                |         |
|----------------|---------|
| Gene Name      | Ii-1b   |
| Slope          | -3.3084 |
| Efficiency     | 2.01    |
| Error          | 0.29    |
| R <sup>2</sup> | 0.99    |
| Y-Intercept    | 49.59   |

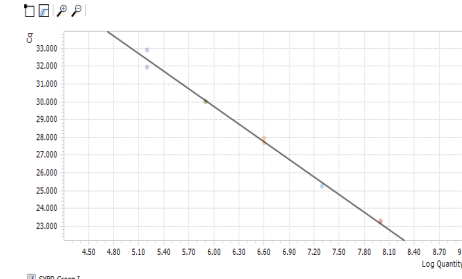

|                |         |
|----------------|---------|
| Gene Name      | Tbp     |
| Slope          | -3.2247 |
| Efficiency     | 2.04    |
| Error          | 0.20    |
| R <sup>2</sup> | 1.00    |
| Y-Intercept    | 50.94   |

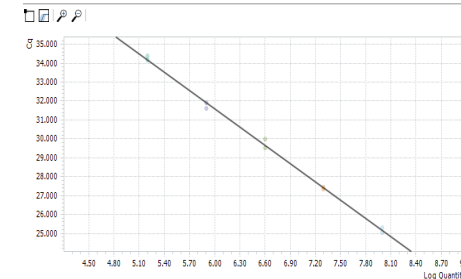

|                |         |
|----------------|---------|
| Gene Name      | Nomo    |
| Slope          | -3.2827 |
| Efficiency     | 2.02    |
| Error          | 0.29    |
| R <sup>2</sup> | 0.99    |
| Y-Intercept    | 48.00   |

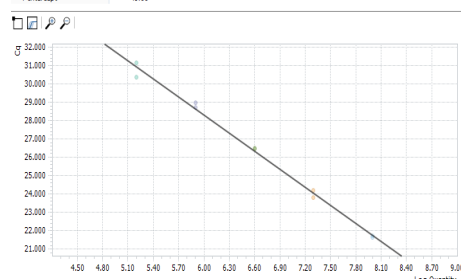

|                |         |
|----------------|---------|
| Gene Name      | Ppia    |
| Slope          | -3.4494 |
| Efficiency     | 1.95    |
| Error          | 0.13    |
| R <sup>2</sup> | 1.00    |
| Y-Intercept    | 45.89   |

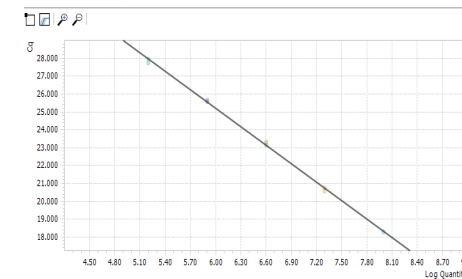

|                |         |
|----------------|---------|
| Gene Name      | Rajb0   |
| Slope          | -3.3607 |
| Efficiency     | 1.98    |
| Error          | 0.11    |
| R <sup>2</sup> | 1.00    |
| Y-Intercept    | 45.44   |

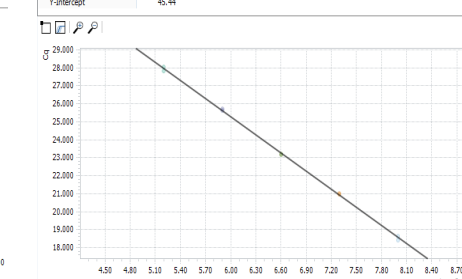

|                |         |
|----------------|---------|
| Gene Name      | Tnf     |
| Slope          | -2.8383 |
| Efficiency     | 2.25    |
| Error          | 0.29    |
| R <sup>2</sup> | 0.99    |
| Y-Intercept    | 50.49   |

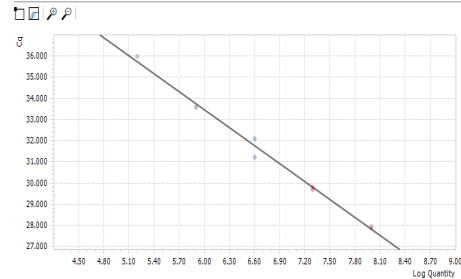

|                |         |
|----------------|---------|
| Gene Name      | Trfc    |
| Slope          | -3.4701 |
| Efficiency     | 1.94    |
| Error          | 0.18    |
| R <sup>2</sup> | 1.00    |
| Y-Intercept    | 50.74   |

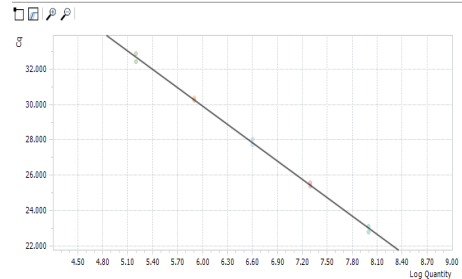

|                |         |
|----------------|---------|
| Gene Name      | Oat1    |
| Slope          | -3.4193 |
| Efficiency     | 1.96    |
| Error          | 0.33    |
| R <sup>2</sup> | 0.99    |
| Y-Intercept    | 36.65   |

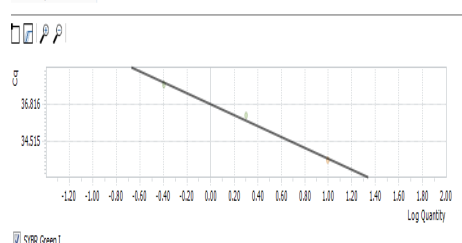

Supplement: srep42427-s1.pdf [file srep42427-s1.pdf]
